1 **A systematic review of *Schistosoma intercalatum*: an obscure causative agent of human**  
2 **schistosomiasis**

3 Oluwaremilekun Grace Ajakaye<sup>a,\*</sup>, Jean Pierre Kambala Mukendi<sup>b,c</sup>, Eddy Laken Kakiese<sup>c</sup>,  
4 Dieudonne Mumba Ngoyi<sup>b,c</sup>, Masceline Jenipher Mutsaka-Makuvaza<sup>d,e</sup>

5 <sup>a</sup>Department of Animal and Environmental Biology, Adekunle Ajasin University, Akungba-Akoko,  
6 Ondo State, Nigeria.

7 <sup>b</sup> Department of Tropical Medicine, Infectious and Parasitic Diseases, Faculty of Medicine,  
8 University of Kinshasa, Kinshasa, Democratic Republic of the Congo.

9 <sup>c</sup> Department of Parasitology, Institut National de Recherche Biomédicale (INRB), Kinshasa,  
10 Democratic Republic of the Congo.

11 <sup>d</sup>Department of Microbiology and Parasitology, School of Medicine and Pharmacy, University of  
12 Rwanda.

13 <sup>e</sup> National Institute of Health Research, Ministry of Health and Child Care, Zimbabwe.

14 \*Corresponding author: email: [oluwaremilekun.ajakaye@aaua.edu.ng](mailto:oluwaremilekun.ajakaye@aaua.edu.ng)

## 15 **Abstract**

## 16 **Background**

17 Human schistosomiasis caused by *Schistosoma intercalatum* is poorly understood compared to  
18 other species of public health importance, such as *S. haematobium*, *S. mansoni*, and *S.*  
19 *japonicum*. The restricted distribution of *S. intercalatum* in Africa, its perceived low virulence,  
20 and poor understanding of its pathological consequences are possible reasons for this neglect.  
21 However, schistosomiasis as a public health problem cannot be eradicated without adequate  
22 knowledge of existing species of schistosomes and the biological interactions between them,  
23 their hosts, and the environment. Current information on *S. intercalatum* is often confused with  
24 the previous *S. intercalatum* (Lower Guinea strain) which has now been described as *S.*  
25 *guineensis* n. sp. The *S. intercalatum* (Zaire strain) with known foci only in Democratic Republic  
26 of the Congo (DRC) is now recognized as the ‘true’ *S. intercalatum* species. Investigators not  
27 conversant with the present status of both species still get confused in understanding the  
28 literature hence this review. It is essential to discuss available knowledge on *S. intercalatum* and  
29 highlight gaps that are critical for deepening our understanding of the parasite in the DRC.

## 30 **Methods**

31 Thus, we systematically review existing available literature on *S. intercalatum* obtained from  
32 PubMed Central, Web of Science, Embase, and Scopus databases according to the Preferred  
33 Reporting Items for Systematic Reviews and Meta-Analyses (PRISMA) guidelines. Relevant  
34 publications were screened and publications reporting *S. intercalatum* from other than the DRC  
35 were excluded. Eligible studies on the epidemiology and biology of *S. intercalatum* were  
36 reviewed.

## 37 **Results**

38 Based on 38 publications that met our inclusion criteria, we confirm that *S. intercalatum* is the  
39 most neglected among *Schistosoma* species responsible for human schistosomiasis. We  
40 discuss our synthesis of the available information in the context of the distribution, biology,

41 pathology, and genetics of *S. intercalatum*. Also highlighted are outstanding questions on *S.*  
42 *intercalatum* population genomics, hybridization with other *Schistosoma* species, snail vector  
43 host, zoonotic epidemiology, and pathology.

#### 44 **Conclusion**

45 The review calls for a rekindling of research interest in the parasite and the need to answer  
46 fundamental questions that can deepen our understanding of the parasite epidemiology,  
47 disease ecology, and environmental interactions to help in control strategies and elimination.

48 **Keywords:** Schistosomiasis, *S. intercalatum*, hybridization, Biology, Pathology, DRC

49

#### 50 **Introduction**

51 Three parasitic worm species in the genus *Schistosoma* (*S. mansoni*, *S. japonicum*, and *S.*  
52 *haematobium*) are the widely recognized and studied causative agents of human  
53 schistosomiasis. *Schistosoma japonicum* and *S. mansoni* are responsible for intestinal  
54 schistosomiasis, while *S. haematobium* is responsible for urogenital schistosomiasis. Other  
55 species include *S. guineensis*, *S. intercalatum*, and *S. mekongi*, which have a lower global  
56 prevalence because of their localized distribution and, thus, are the least studied [1,2].

57 The adult stages of the parasites lodge in the host's blood vessels within the intestinal or  
58 urogenital systems, where the mature female produces thousands of eggs, which are deposited  
59 in various tissues and organs, most notably the liver, bladder, small and large intestine, cervix,  
60 and vagina. Most disease pathology arises from inflammatory reactions and immune responses  
61 due to trapped eggs in the various organs. It can result in complications such as  
62 hepatosplenomegaly, periportal fibrosis, bladder cancer, and female genital schistosomiasis [1,  
63 2].

64 Although under-studied because of its localized distribution, and first identified in the Upper  
65 Congo by Chesterman, *S. intercalatum* is also of medical importance as responsible for rectal  
66 schistosomiasis. [3]. In 1934, Fisher [4] described the parasite as a new species of

67 schistosome, and the features of the eggs essentially led to the name '*intercalatum*' to  
68 underscore the intermediate profile when compared to eggs by *S. haematobium* and the bovine  
69 schistosome *S. bovis* [4]. Before the year 2003, two unique populations of *S. intercalatum* were  
70 recognized and marked by specific geographic locations, snail hosts, prepatent period in snail,  
71 egg morphometrics, isoenzyme patterns, Random Amplified Polymorphic DNA (RAPD), and  
72 Restriction Fragment Length Polymorphism (RFLP) [5 - 10]. Pages [11] supported by DNA  
73 sequencing data, grouped the *S. intercalatum* populations from the Lower Guinea forest region  
74 of Cameroon as a unique species described as *S. guineensis* n. sp. Other countries in the  
75 Lower Guinea forest region with reported foci for *S. guineensis* include Gabon, Equatorial  
76 Guinea, Nigeria, Benin Republic, and Sao Tome and Principe. Presently, *S. intercalatum* is  
77 known to have foci only in the Democratic Republic of the Congo (DRC) [12, 13].  
78 Although the distinct taxonomic status of *S. intercalatum* and *S. guineensis* was established in  
79 2003, the large literature on *S. intercalatum* prior to 2003 has yet to be systematically reviewed  
80 and sorted according to species. Investigators not conversant with the present status of both  
81 species still get confused in understanding the literature. In this review, we focus only on  
82 literature pertaining to *S. intercalatum* species with known loci in the DRC. We discuss our  
83 synthesis of the available information in the context of the distribution, biology, pathology, and  
84 genetics of *S. intercalatum*.

## 85 **Methodology**

### 86 *Eligibility*

87 Our primary objective was to compile peer-reviewed research publications, review articles, and  
88 case reports pertaining only to *S. intercalatum* species from the DRC. We aimed at synthesizing  
89 the information from all available publications from the 1900s till date. Our inclusion and  
90 exclusion criteria were based on the geographical source of the *S. intercalatum* reported in a  
91 publication. Literature reporting *S. intercalatum* originating from the DRC was included, while

92 publications citing *S. intercalatum* originating from other African countries were considered as *S.*  
93 *guineensis* and thus excluded from our pool of literature for the review.

#### 94 *Literature search strategy*

95 Three authors, OGA, JPKM, and ELK were responsible for the literature search and selection.  
96 Both JPKM and ELK are fluent French speakers and were therefore able to thoroughly appraise  
97 publications that were in the French language. A literature search of bibliographic databases  
98 Web of Science, EMBASE, SCOPUS, and PubMed Central was conducted between April 2022  
99 and August 2023 for publications reported between the year 1900 to August 2023. To  
100 complement the database search, a manual search of publications was conducted by examining  
101 references from reviews and opinion articles on *S. intercalatum* or other *Schistosoma* species.  
102 Two search terms, “*Schistosoma intercalatum*” and “*intercalatum*” were used within field tags  
103 ‘Article Title,’ Abstract,’ and ‘Key Words’. Analysis of the retrieved literature complied with the  
104 reporting elements for systematic reviews guidelines prescribed in the PRISMA 2020 statement  
105 for reporting systematic reviews [14].

#### 106 **Results**

107 A total of 2,814 publications were retrieved from bibliographic databases, and after screening,  
108 38 met the eligibility criteria and were used for full-text review (Fig.1).

#### 109 **Discussion**

##### 110 ***Schistosoma intercalatum* in the DRC**

111 The history of *S. intercalatum* in the DRC dates to early 1900 in the regions around the former  
112 Belgian Congo (the present-day countries of DRC, the Republic of Congo, and parts of the  
113 Central African Republic). Several investigators reported terminal-spined *S. haematobium*-like  
114 eggs exclusively from stool samples in several foci in the Belgian Congo (see review in Fisher,  
115 [4]). Gillet and Wolfs [15] have also provided detailed historical accounts of the distribution and  
116 biology of three agents of schistosomiasis (*S. mansoni*, *S. haematobium*, and *S. intercalatum*) in  
117 the Belgian Congo. The last review of published research on schistosomiasis in the DRC

118 confirmed the occurrence of one or more species of *Schistosoma* by microscopy (*S. mansoni*,  
119 *S. haematobium*, and *S. intercalatum*) in all but one of the provinces in the country [16]. The  
120 current prevalence rate of *S. intercalatum* is unknown. However, old reports based on  
121 microscopic analysis indicated it ranges between 1 and 10% [9, 17], except for the study by  
122 Gillet and Wolfs [15] and Schwetz [18], which reported above 30%. Although there are no recent  
123 reports of the bovine schistosome *S. bovis* in the DRC, its occurrence has been documented  
124 previously [18, 19]. In these studies, which used 781 cattle to determine the possible  
125 associations between different bovine trematode species in the Ituri region of the DRC, *S. bovis*  
126 adult worms were recovered from the mesenteric veins.

## 127 **Biology of *S. intercalatum***

### 128 **i. Lifecycle**

129 *Schistosoma intercalatum* lifecycle, larval and adult stages are similar to other known human  
130 *Schistosoma* species (Fig. 2). Fisher [4] and Wright [5] have provided morphometric and  
131 behavioral information on the species from isolates originally derived from a patient in Kinshasa,  
132 which were experimentally passaged through infected mice or hamsters.

133 The cercariae of *S. intercalatum* and *S. guineensis* (formerly *S. intercalatum*, Lower Guinea  
134 strain) have been observed to concentrate near the surface of the water and readily attach to  
135 floating debris or the sides of a container in the laboratory, in contrast to *S. mansoni* cercariae,  
136 which typically swim to the surface of the water, rest briefly, and sink partially before swimming  
137 back [5, 20].

### 138 **ii. Snail host**

139 Crucial to the lifecycle of schistosomes are the appropriate intermediate snail hosts, and for *S.*  
140 *intercalatum*, Fisher [4] reported *Physopsis africana* (old nomenclature), now *Bulinus africanus*.  
141 However, the known difficulty in accurately morphologically identifying *Bulinus* species in Africa  
142 warrants the use of currently available molecular tools to aid species identification [8, 21 - 23].  
143 Wright et al. [5] were unsuccessful in infecting several *Bulinus* species (*B. africanus*, *B.*

144 *globosus*, *B. ugandae*, *B. nasutus*, *B. forskalii*, and *B. camerunensis*) that had been collected  
145 from various countries in Africa and bred in the lab with *S. intercalatum*. Only *B. globosus* from  
146 South Africa, Ghana, Zimbabwe, Sudan, and *B. wrighti* from Saudi Arabia were successfully  
147 infected. However, Wright et al. [5] observed a lengthier prepatent period compared with other  
148 species of *Schistosoma* investigated in the study. Frandsen [6, 24], however, demonstrated  
149 successful experimental *S. intercalatum* infections of *B. globosus* from Malawi, Togo, Rhodesia  
150 (Zimbabwe), and DRC. Interestingly, *B. africanus* from Kenya and Tanzania were susceptible to  
151 *S. intercalatum*, while the albino strain of *B. globosus* from Zimbabwe was the most compatible  
152 compared to other snail species successfully infected. De Clercq [17] also confirmed *B.*  
153 *globosus* as natural hosts for *S. intercalatum* in the DRC. However, Tchuem Tchuente et al. [9]  
154 were unsuccessful in finding naturally infected snails for *S. intercalatum* in the DRC but reported  
155 similar experimental results reported by Wright et al. [5]. The snail infection trials demonstrated  
156 incompatibility between *S. intercalatum* and *B. forskalii*, *B. truncatus/B. tropicus* complex, and *B.*  
157 *africanus* group, except for *B. globosus* from Zambia and *B. wrighti* snails. Although Frandsen  
158 [6, 24] has done extensive snail host specificity experiments for *S. intercalatum*, they were by  
159 no means exhaustive of the diversity of *Bulinus* species in Africa [8]. Also, the susceptibility and  
160 compatibility of other non-*Bulinus* species to *S. intercalatum* are yet unknown.

161 How snail hosts genetic diversity impacts *S. intercalatum* presents an intriguing line of research,  
162 and in the scenario of hybridization between *S. intercalatum* and other *Schistosoma* species, it  
163 would be essential to determine if hybrid *S. intercalatum* recruits new snail hosts. Questions on  
164 the genetic basis of *Bulinus-S. intercalatum* interaction is unanswered. On the possibility of  
165 control strategies targeting snail hosts, there is a need to identify genes that convey natural  
166 resistance to *S. intercalatum* in *Bulinus* species, which may facilitate ways of disrupting the  
167 parasite's life cycle and reducing transmission to humans.

### 168 **iii. Reservoir hosts**

169 Unlike the two main agents of intestinal schistosomiasis (*S. mansoni* and *S. japonicum*) with a  
170 broad spectrum of reservoir hosts, no known natural reservoir hosts for *S. intercalatum* in the  
171 DRC have been identified. Monkeys, Congo clawless otters (*Aonyx congica*), sheep, and goats  
172 examined for *S. intercalatum* by Fisher [4] were uninfected. However, Fisher [4] successfully  
173 infected a male sheep with cercariae of *S. intercalatum*. Schwetz [18] was also able to infect  
174 both sheep and goats with *S. intercalatum* using the same route of infection as by Fisher [4],  
175 although no one else has ever tried this route to confirm these findings.

176 The role of animal reservoir hosts in *S. intercalatum* transmission remains unexplored. Fisher [4]  
177 and Schwetz [18] examined a few mammalian species without recording any natural host for *S.*  
178 *intercalatum*. Several species of rodents across Africa are known to serve as natural reservoir  
179 hosts of several species of *Schistosoma* and hybrid *S. haematobium* x *S. bovis* [25, 26]. The  
180 rodent species frequenting water bodies in schistosomiasis endemic communities in the DRC  
181 will be interesting for investigation. There is now a wide range of molecular approaches for  
182 detecting pathogens that do not require invasive sampling. Also, environmental DNA techniques  
183 provide an opportunity for detecting nucleic acid traces in various environmental samples [27 -  
184 29].

### 185 **Pathology of *S. intercalatum***

186 There is generally a dearth of information on the clinical aspects of *S. intercalatum* due to  
187 limited studies on the parasite. There is a need for an adequate understanding of the  
188 pathological impacts of the parasite to inform necessary control and elimination strategies.  
189 Fisher [4] and Schwetz [18] have highlighted several *S. intercalatum* clinical signs similar to  
190 other intestinal human schistosomiasis caused by *S. mansoni*, *S. guineensis*, and *S. japonicum*.  
191 Wolfe [30] provided a case report of an American family returning to the USA from Kisangani,  
192 Eastern DRC who were infected with *S. intercalatum* after parasitological examination of stool.  
193 The common symptoms that have been reported include abdominal pain, blood in stool,



194 dysentery, and a few cases of palpable, enlarged livers. None of the reported cases showed  
195 any marked degree of anemia.

### 196 **Molecular epidemiology of *S. intercalatum***

197 Before the separation of the Lower Guinea strain of *S. intercalatum* (now *S. guineensis*) from  
198 the DRC *S. intercalatum* species, genotyping studies of both species were performed using  
199 isoenzyme patterns, Random Amplified Polymorphic DNA (RAPD) and Restriction Fragment  
200 Length Polymorphism (RFLP) [7 - 9]. DNA-sequence data based on three mitochondrial genes,  
201 (cytochrome oxidase subunit 1 (cox1), NADH dehydrogenase subunit 6 (nad6) and small  
202 ribosomal RNA (rrnS)) was pivotal evidence for the eventual distinctions between the two  
203 species and the subsequent description of *S. guineensis* [10 - 12]. Presently the available DNA  
204 sequence data on *S. intercalatum* archived on the NCBI nucleotide database is problematic  
205 because some of the sequences labeled as *S. intercalatum* are that of *S. guineensis* [11 - 13]  
206 (Table 1). Unfortunately, most nucleotide sequences deposited at the NCBI are rarely revised or  
207 corrected after their initial submission. Apart from sequence alignments consistent with the  
208 phylogram reported in [11, [12], and [13], users can quickly ascertain the NCBI sequence data  
209 on *S. intercalatum* by checking the country of origin of the isolate (*S. intercalatum* will  
210 expectedly be from DRC). Webster et al. [13] have also provided information for the correct  
211 taxonomic names for sequences on the NCBI nucleotide database labeled as *S. intercalatum*  
212 (now *S. guineensis*) and those from DRC representing *S. intercalatum*.

213 Table 1. Correct names for nucleotide sequences labeled as *Schistosoma intercalatum* on NCBI

### 214 **Outstanding questions on *S. intercalatum***

215 Although schistosomiasis is considered a neglected tropical disease, *S. intercalatum* appears to  
216 be the most neglected among the species that cause human schistosomiasis. It is probably due  
217 to the difficulty in accessing new specimens from DRC after decades of protracted conflicts and  
218 insecurity in the country. The genetic basis for the restricted distribution of *S. intercalatum* is still  
219 unknown. However, the availability of modern DNA sequencing technologies, including Next

220 Generation Sequencing (NGS), provides an opportunity for robust genomic investigations on *S.*  
221 *intercalatum*. Some outstanding questions still in need of answers include:

222 i. **Genetic diversity and population genetics / genomics:** Compared to other *Schistosoma*  
223 species of medical importance, there is no information on the genetic diversity or population  
224 genetics of *S. intercalatum*. Given the large landmass area of the DRC with its diverse  
225 ecological zones and abundant wildlife, it would be interesting to unravel the evolutionary  
226 dynamics of the parasite over time.

227 ii. **Hybridization:** Interspecific hybridization has been demonstrated to occur in the laboratory  
228 within the *S. haematobium* species complex, which is comprised of eight sister species  
229 including *S. intercalatum*, *S. guineensis*, *S. bovis*, *S. mattheei*, *S. margrebowei*, *S. leiperi*, *S.*  
230 *curassoni*, and *S. kisumuensis*) [37, 38]. Increasingly, hybrids are being recovered from field  
231 sites, but the true extent to which this is occurring in nature remains enigmatic. This is largely  
232 because no systematic genotyping strategy exists, and only limited gene markers or genome-  
233 scale datasets have been derived from *Schistosoma* samples collected from natural infections.  
234 To date, interspecific hybrids within the *S. haematobium* group species have been described  
235 especially between *S. haematobium* x *S. bovis* (reviewed in [39]), *S. haematobium* x *S.*  
236 *guineensis* [38], *S. haematobium* x *S. mattheei* [39] and *S. bovis* x *S. curassoni* [40]. DNA  
237 sequence data has thus far not identified any field isolates that exist as *S. intercalatum* hybrids  
238 with other *Schistosoma* species, although, based on isoenzyme analysis, Tchuem Tchuente et  
239 al. [9] reported that natural hybridization is occurring between *S. haematobium* and *S.*  
240 *intercalatum* in the DRC. The reference genome for *S. intercalatum*, sequenced as part of a  
241 consortia project [41] is freely available on the NCBI Short Read Archives (see [40] for details)  
242 and appears to be devoid of mixed ancestry. However, previous *S. intercalatum* hybridization  
243 experiments with *S. guineensis* or *S. mansoni* have established that *S. intercalatum* is mating  
244 competent under laboratory conditions with its sister species, *S. guineensis* [42 - 44]. Through a  
245 suite of genome analysis tools, it is now possible to analyse the direction of introgression within

246 inter species hybrids, to identify introgressed genes, and to establish whether the hybrids could  
247 alter virulence phenotypes [37, 45].

248 iii. **Epidemiology and pathology:** Tchuem Tchuente [9], to our knowledge, is the last peer-  
249 reviewed publication on the epidemiology of *S. intercalatum* from the DRC. There is a need for a  
250 nationwide epidemiological survey to determine the current prevalence of *S. intercalatum* or its  
251 hybrid in the DRC and neighbouring countries and detailed documentation of clinical signs of  
252 the disease. Importantly, molecular studies of samples from such nationwide surveys will  
253 provide information to understand if *S. intercalatum* has been entirely replaced by *S.*  
254 *haematobium* as was reported for *S. guineensis* replacement by *S. haematobium* in [46 - 48].

## 255 **Conclusion**

256 Arguably, the 1990s intense security challenges in the DRC affected the study of *S.*  
257 *intercalatum*. Now that the security in the DRC has improved, there is a need for renewed  
258 interest in studying *S. intercalatum*. While lessons learned from current research in Africa on the  
259 two major African human schistosome species, *S. mansoni* and *S. haematobium*, can be  
260 applied in other endemic regions, there is no such scenario for *S. intercalatum*. It is of  
261 epidemiological importance to know the degree to which *S. intercalatum* is cross-hybridizing vs.  
262 inbreeding and whether this is impacting the incidence and severity of rectal schistosomiasis in  
263 the country. In light of the World Health Organization's roadmap for the elimination of human  
264 schistosomiasis, an understanding of the molecular epidemiology of all causative agents and  
265 the complex interactions between them, their various host species, and the disease ecology are  
266 all vital.

## 267 **Declarations**

268 Ethics approval and consent to participate

269 Not Applicable

270 Consent for publication

271 Not Applicable

272 Availability of data and materials

273 All data generated or analysed during this study are included in this published article.

274 Competing Interest

275 The authors declare no conflict of interest.

276 Funding

277 This research received no external funding.

278 Author Contributions

279 OGA, ELK and JPKM did the literature searches; OGA and JPKM wrote the manuscript. JPKM  
280 and MJM updated the text; ELK and DMN reviewed the manuscript; and OGA and JPKM  
281 organized and edited the final manuscript.

282 Acknowledgements

283 We would like to thank Elisha Enabulele for generating the outstanding figure, and Michael  
284 Grigg for critical reading of the manuscript.

285 **References**

- 286 1. Colley DG, Bustinduy AL, Secor WE, King CH. Human schistosomiasis. *Lancet*. 2014  
287 Jun 28;383(9936):2253-64. doi: 10.1016/S0140-6736(13)61949-2.
- 288 2. McManus DP, Dunne DW, Sacko M, Utzinger J, Vennervald BJ, Zhou XN.  
289 Schistosomiasis. *Nat Rev Dis Primers*. 2018 Aug 9;4(1):13. doi: 10.1038/s41572-018-  
290 0013-8.
- 291 3. Chesterman CC. Note sur la bilharziose dans la region de Stanleyvirle. *Ann. Soc. Belg.*  
292 *Med. Trop.*, 1923, 3, 73-75.
- 293 4. Fisher AC. A study of the schistosomiasis of the Stanleyville district of the Belgian  
294 congo. *Transactions of Trans. R. Soc. Trop. Med. Hyg. T ROY SOC TROP MED*  
295 *H*,1934; 28 (3), 277–306, doi : [10.1016/S0035-9203\(34\)90066-3](https://doi.org/10.1016/S0035-9203(34)90066-3).
- 296 5. Wright CA, Southgate VR, Knowles RJ. What is *Schistosoma intercalatum* Fisher, 1934?  
297 *Trans R Soc Trop Med Hyg*. 1972;66(1):28-64. doi: 10.1016/0035-9203(72)90052-1.

- 298 6. Frandsen F. Hybridization between different strains of *Schistosoma intercalatum* Fisher,  
299 1934 from Cameroun and Zaire. *J Helminthol.* 1978 Mar;52(1):11-22. doi:  
300 10.1017/s0022149x0000506x.
- 301 7. Wright CA, Southgate VR, Ross GC. Enzymes in *Schistosoma intercalatum* and the  
302 relative status of the Lower Guinea and Zaire strains of the parasite. *Int J Parasitol.* 1979  
303 Dec;9(6):523-8. doi: 10.1016/0020-7519(79)90007-9.
- 304 8. Brown DS, Sarfati C, Southgate VR, Ross GC, Knowles RJ. Observations on  
305 *Schistosoma intercalatum* in south-east Gabon. *Z Parasitenkd.* 1984;70(2):243-53. doi:  
306 10.1007/BF00942227.
- 307 9. Tchuem Tchuente LA, Southgate VR, Vercruysse J, Kaukas A, Kane R, Mulumba MP,  
308 Pagès JR, Jourdan J. Epidemiological and genetic observations on human  
309 schistosomiasis in Kinshasa, Zaire. *Trans R Soc Trop Med Hyg.* 1997 May-  
310 Jun;91(3):263-9. doi: 10.1016/s0035-9203(97)90068-7.
- 311 10. Pagès JR, Durand P, Southgate VR, Tchuem Tchuente LA, Jourdan J. Molecular  
312 arguments for splitting of *Schistosoma intercalatum*, into two distinct species. *Parasitol*  
313 *Res.* 2001 Jan;87(1):57-62. doi: 10.1007/s004360000301.
- 314 11. Pages J.R., Jourdan J., Southgate V.R. & Tchuem Tchuente L.A. 2003.  
315 Reconnaissance de deux espèces jumelles au sein du taxon *Schistosoma intercalatum*  
316 Fisher, 1934, agent de la schistosomose humaine rectale en Afrique. Description de  
317 *Schistosoma guineensis* n. sp. In: *Tax, Ecol Evol Metz Parasit.* Tome II. Combes C. &  
318 Jourdan J. (eds). Presses Universitaires de Perpignan, 139-146.
- 319 12. Kane RA, Southgate VR, Rollinson D, Littlewood DT, Lockyer AE, Pagès JR, Tchuem  
320 Tchuente LA, Jourdan J. A phylogeny based on three mitochondrial genes supports the  
321 division of *Schistosoma intercalatum* into two separate species. *Parasitology.* 2003  
322 Aug;127(Pt 2):131-7. doi: 10.1017/s0031182003003421.

- 323 13. Webster BL, Southgate VR, Littlewood DT. A revision of the interrelationships of  
324 Schistosoma including the recently described Schistosoma guineensis. Int J Parasitol.  
325 2006 Jul;36(8):947-55. doi: 10.1016/j.ijpara.2006.03.005.
- 326 14. Page MJ, McKenzie JE, Bossuyt PM, Boutron I, Hoffmann TC, Mulrow CD, Shamseer L,  
327 Tetzlaff JM, Akl EA, Brennan SE, Chou R, Glanville J, Grimshaw JM, Hróbjartsson A,  
328 Lalu MM, Li T, Loder EW, Mayo-Wilson E, McDonald S, McGuinness LA, Stewart LA,  
329 Thomas J, Tricco AC, Welch VA, Whiting P, Moher D. The PRISMA 2020 statement: an  
330 updated guideline for reporting systematic reviews. BMJ. 2021 Mar 29;372:n71. doi:  
331 10.1136/bmj.n71.
- 332 15. Gillet J, Wolfs J. Les bilharzioses humaines au Congo Belge et au Ruanda-Urundi  
333 [Bilharziosis in the Belgian Congo and in Ruanda-Urundi]. Bull World Health Organ.  
334 1954;10(3):315-419.
- 335 16. Madinga J, Linsuke S, Mpabanzi L, Meurs L, Kanobana K, Speybroeck N, Lutumba P,  
336 Polman K. Schistosomiasis in the Democratic Republic of Congo: a literature review.  
337 Parasit Vectors. 2015 Nov 19;8:601. doi: 10.1186/s13071-015-1206-6.
- 338 17. De Clercq D. La situation malacologique à Kinshasa et description d'un foyer autochtone  
339 de schistosomiase à Schistosoma intercalatum [The malacological situation in Kinshasa  
340 and description of an autochthonous focus of schistosomiasis due to Schistosoma  
341 intercalatum]. Ann Soc Belg Med Trop. 1987 Dec;67(4):345-52.
- 342 18. Schwetz J. Some new comparative investigations on three Physopsis borne  
343 schistosomes: *Schistosoma haematobium*, *Schistosoma bovis* and *Schistosoma*  
344 *intercalatum*. Am. J. Trop. Med. Hyg., 1956, 5, 1071-1085.
- 345 19. Chartier C, Bushu M, Anican U. Les dominantes du parasitisme helminthique chez les  
346 bovins en Ituri (Haut-Zaïre). II. Les associations parasitaires [Characteristics of  
347 helminthic parasitism in cattle in Ituri (Haut-Zaire). II. Parasitic associations]. Rev Elev  
348 Med Vet Pays Trop. 1990;43(4):491-7.

- 349 20. Lewis F. [https://afbr-bri.org/schistosomiasis/standard-operating-procedures/behavior-of-](https://afbr-bri.org/schistosomiasis/standard-operating-procedures/behavior-of-schistosoma-mansoni-cercariae/)  
350 [schistosoma-mansoni-cercariae/](https://afbr-bri.org/schistosomiasis/standard-operating-procedures/behavior-of-schistosoma-mansoni-cercariae/) Accessed 15<sup>th</sup> of March, 2024
- 351 21. Kane RA, Stothard JR, Emery AM, Rollinson D. Molecular characterization of freshwater  
352 snails in the genus *Bulinus*: a role for barcodes? *Parasit Vectors*. 2008 Jun 10;1(1):15.  
353 doi: 10.1186/1756-3305-1-15.
- 354 22. Zhang SM, Bu L, Lu L, Babbitt C, Adema CM, Loker ES. Comparative mitogenomics of  
355 freshwater snails of the genus *Bulinus*, obligatory vectors of *Schistosoma haematobium*,  
356 causative agent of human urogenital schistosomiasis. *Sci Rep*. 2022 Mar 30;12(1):5357.  
357 doi: 10.1038/s41598-022-09305-7.
- 358 23. Babbitt CR, Laidemitt MR, Mutuku MW, Oraro PO, Brant SV, Mkoji GM, Loker ES.  
359 *Bulinus* snails in the Lake Victoria Basin in Kenya: Systematics and their role as hosts  
360 for schistosomes. *PLoS Negl Trop Dis*. 2023 Feb 10;17(2):e0010752. doi:  
361 10.1371/journal.pntd.0010752.
- 362 24. Frandsen F. Further studies on the compatibility between *S. intercalatum* from cameroun  
363 and zaire and species of *bulinus*. *Z Parasitenkd*. 1979 Feb 28;58(2):161-7. doi:  
364 10.1007/BF01951340.
- 365 25. Standley CJ, Dobson AP, Stothard JR. Out of animals and back again: schistosomiasis  
366 as a zoonosis in Africa. In: Rokni MB, ed. *Schistosomiasis*. InTech 2012: 209–230.  
367 ISBN: 978- 953-307-852-6.
- 368 26. Catalano S, Sène M, Diouf ND, Fall CB, Borlase A, Léger E, Bâ K, Webster JP. Rodents  
369 as Natural Hosts of Zoonotic *Schistosoma* Species and Hybrids: An Epidemiological and  
370 Evolutionary Perspective From West Africa. *J Infect Dis*. 2018 Jul 2;218(3):429-433. doi:  
371 10.1093/infdis/jiy029.

- 372 27. Farrell JA, Whitmore L, Duffy DJ. The Promise and Pitfalls of Environmental DNA and  
373 RNA Approaches for the Monitoring of Human and Animal Pathogens from Aquatic  
374 Sources. *Bioscience*. 2021 Apr 21;biab027. doi: 10.1093/biosci/biab027.
- 375 28. Schilling AK, Mazzamuto MV, Romeo C. A Review of Non-Invasive Sampling in Wildlife  
376 Disease and Health Research: What's New? *Animals (Basel)*. 2022 Jul 2;12(13):1719.  
377 doi: 10.3390/ani12131719.
- 378 29. Bass D, Christison KW, Stentiford GD, Cook LSJ, Hartikainen H. Environmental  
379 DNA/RNA for pathogen and parasite detection, surveillance, and ecology. *Trends*  
380 *Parasitol*. 2023 Apr;39(4):285-304. doi: 10.1016/j.pt.2022.12.010.
- 381 30. Wolfe MS. *Schistosoma intercalatum* infection in an American family. *Am J Trop Med*  
382 *Hyg*. 1974 Jan;23(1):45-50. doi: 10.4269/ajtmh.1974.23.45.
- 383 31. Lockyer AE, Olson PD, Ostergaard P, Rollinson D, Johnston DA, Attwood SW,  
384 Southgate VR, Horak P, Snyder SD, Le TH, Agatsuma T, McManus DP, Carmichael AC,  
385 Naem S, Littlewood DT. The phylogeny of the Schistosomatidae based on three genes  
386 with emphasis on the interrelationships of *Schistosoma* Weinland, 1858. *Parasitology*.  
387 2003 Mar;126(Pt 3):203-24. doi: 10.1017/s0031182002002792.
- 388 32. Sealey KL, Kirk RS, Walker AJ, Rollinson D, Lawton SP. Adaptive radiation within the  
389 vaccine target tetraspanin-23 across nine *Schistosoma* species from Africa. *Int J*  
390 *Parasitol*. 2013 Jan;43(1):95-103. doi: 10.1016/j.ijpara.2012.11.007.
- 391 33. Bowles J, Blair D, McManus DP. A molecular phylogeny of the human schistosomes.  
392 *Mol Phylogenet Evol*. 1995 Jun;4(2):103-9. doi: 10.1006/mpev.1995.1011.
- 393 34. Abbasi I, King CH, Sturrock RF, Kariuki C, Muchiri E, Hamburger J. Differentiation of  
394 *Schistosoma haematobium* from related schistosomes by PCR amplifying an inter-  
395 repeat sequence. *Am J Trop Med Hyg*. 2007 May;76(5):950-5.
- 396 35. Barker SC, Blair D. Molecular phylogeny of *Schistosoma* species supports traditional  
397 groupings within the genus. *J Parasitol*. 1996 Apr;82(2):292-8.



- 398 36. Michot B, Despres L, Bonhomme F, Bachellerie JP. Conserved secondary structures in  
399 the ITS2 of trematode pre-rRNA. FEBS Lett. 1993 Feb 1;316(3):247-52. doi:  
400 10.1016/0014-5793(93)81301-f.
- 401 37. Leger E, Webster JP. Hybridizations within the Genus Schistosoma: implications for  
402 evolution, epidemiology and control. Parasitology. 2017 Jan;144(1):65-80. doi:  
403 10.1017/S0031182016001190. Epub 2016 Aug 30. PMID: 27572906.
- 404 38. Landeryou T, Rabone M, Allan F, Maddren R, Rollinson D, Webster BL, Tchuem-  
405 Tchuente LA, Anderson RM, Emery AM. Genome-wide insights into adaptive  
406 hybridisation across the Schistosoma haematobium group in West and Central Africa.  
407 PLoS Negl Trop Dis. 2022 Jan 31;16(1):e0010088. doi: 10.1371/journal.pntd.0010088.
- 408 39. Rey O, Webster BL, Huyse T, Rollinson D, Van den Broeck F, Kincaid-Smith J,  
409 Onyekwere A, Boissier J. Population genetics of African Schistosoma species. Infect  
410 Genet Evol. 2021 Apr;89:104727. doi: 10.1016/j.meegid.2021.104727.
- 411 40. Berger DJ, Léger E, Sankaranarayanan G, Sène M, Diouf ND, Rabone M, Emery A,  
412 Allan F, Cotton JA, Berriman M, Webster JP. Genomic evidence of contemporary  
413 hybridization between Schistosoma species. PLoS Pathog. 2022 Aug 8;18(8):e1010706.  
414 doi: 10.1371/journal.ppat.1010706.
- 415 41. IHGCCG -International Helminth Genomes Consortium. Comparative genomics of the  
416 major parasitic worms. Nat Genet. 2019 Jan;51(1):163-174. doi: 10.1038/s41588-018-  
417 0262-1. Epub 2018 Nov 5.
- 418 42. Børneboe A, Frandsen F. A comparison of the characteristics of two strains of  
419 Schistosoma intercalatum Fisher, 1934 in mice. J Helminthol. 1979 Sep;53(3):195-203.  
420 doi: 10.1017/s0022149x00005976.
- 421 43. Pagès JR, Southgate VR, Tchuem Tchuente LA, Jourdane J. Experimental evidence of  
422 hybrid breakdown between the two geographical strains of Schistosoma intercalatum.  
423 Parasitology. 2002 Feb;124(Pt 2):169-75. doi: 10.1017/s0031182001001068.

- 424 44. Cosgrove CL, Southgate VR. Interactions between *Schistosoma intercalatum* (Zaire  
425 strain) and *S. mansoni*. *J Helminthol.* 2003 Sep;77(3):209-18. doi:  
426 10.1079/JOH2002165.
- 427 45. Moran BM, Payne C, Langdon Q, Powell DL, Brandvain Y, Schumer M. The genomic  
428 consequences of hybridization. *Elife.* 2021 Aug 4;10:e69016. doi: 10.7554/eLife.69016.
- 429 46. Tchuem Tchuente LA, Southgate VR, Njiokou F, Njiné T, Koueméni LE, Jourdané J. The  
430 evolution of schistosomiasis at Loum, Cameroon: replacement of *Schistosoma*  
431 *intercalatum* by *S. haematobium* through introgressive hybridization. *Trans R Soc Trop*  
432 *Med Hyg.* 1997b Nov-Dec;91(6):664-5. doi: 10.1016/s0035-9203(97)90513-7.
- 433 47. Webster BL, Tchuem Tchuente LA, Jourdané J, Southgate VR. The interaction of  
434 *Schistosoma haematobium* and *S. guineensis* in Cameroon. *J Helminthol.* 2005  
435 Sep;79(3):193-7. doi: 10.1079/joh2005306.
- 436 48. Kabore A, Ibikounle M, Tougoue JJ, Mupoyi S, Ndombe M, Shannon S, Ottesen EA,  
437 Mukunda F, Awaca N. Initiating NTD programs targeting schistosomiasis and soil-  
438 transmitted helminthiasis in two provinces of the Democratic Republic of the Congo.  
439 Establishment of baseline prevalence for mass drug administration. *Acta Trop.* 2017  
440 Feb; 166:177-185. doi: 10.1016/j.actatropica.2016.11.023.
- 441

442 Table 1. Correct names for nucleotide sequences labeled as *Schistosoma intercalatum* on  
 443 NCBI

| Source country        | Name on NCBI           | Accession # (isolate)                                                    | Gene                               | Base pairs             | Reference | Correct name           |
|-----------------------|------------------------|--------------------------------------------------------------------------|------------------------------------|------------------------|-----------|------------------------|
| DRC                   | <i>S. intercalatum</i> | DQ354362,<br>DQ354363,<br>DQ354364<br>(NHM3367/<br>NHM3397) <sup>+</sup> | 28S<br>rRNA, 18S<br>rRNA,<br>cox1, | 3834,<br>1855,<br>1126 | [13]      | <i>S. intercalatum</i> |
| São Tomé and Príncipe | <i>S. intercalatum</i> | AY157208,<br>AY157235,<br>AY157262<br>(NHM3188)                          | cox1, 18S<br>rRNA, 28S<br>rRNA     | 1125,<br>1863,<br>3834 | [31]      | <i>S. guineensis</i>   |
| DRC                   | <i>S. intercalatum</i> | JX844184 &<br>JX844185                                                   | tetraspanin<br>-23 (TSP-<br>23)    | 1580                   | [32]      | <i>S. intercalatum</i> |
| Cameroon              | <i>S. intercalatum</i> | U22160,<br>U22166                                                        | cox1, 5.8S,<br>ITS2, 28S<br>rRNA   | 372,<br>331            | [33]      | <i>S. guineensis</i>   |

|                               |                           |                                                                        |                                                            |                              |             |                                                        |
|-------------------------------|---------------------------|------------------------------------------------------------------------|------------------------------------------------------------|------------------------------|-------------|--------------------------------------------------------|
| DRC                           | S.<br><i>intercalatum</i> | DQ831703,<br>DQ831704**                                                | clone<br>Sinter23 &<br>Sinter25<br>repetitive<br>sequences | 493 &<br>503                 | [34]        | S.<br><i>Intercalatum</i><br>& S.<br><i>guineensis</i> |
| DRC                           | S.<br><i>intercalatum</i> | AJ519529,<br>AJ519515,<br>AJ416894,<br>AJ419779<br>(held in<br>France) | 28S rRNA,<br>cox1, nad6,<br>12S rRNA                       | 680,<br>1224,<br>420,<br>754 | [12]        | S.<br><i>Intercalatum</i>                              |
| DRC                           | S.<br><i>intercalatum</i> | AJ519527,<br>AJ519519,<br>AJ416899,<br>AJ419781<br>(NHM3396)           | 28S rRNA,<br>cox1, nad6,<br>12S rRNA                       | 680,<br>1224,<br>420,<br>754 | [12]        | S.<br><i>Intercalatum</i>                              |
| São Tomé<br>and<br>Príncipe** | S.<br><i>intercalatum</i> | Z72146                                                                 | 18S rRNA                                                   | 333                          | Unpublished | S.<br><i>guineensis</i>                                |
| Cameroon                      | S.<br><i>intercalatum</i> | U42564,<br>U42558                                                      | 18S rRNA<br>v4 domain,<br>28S rRNA<br>D1 domain            | 314,<br>173                  | [35]        | S.<br><i>guineensis</i>                                |
| Cameroon                      | S.<br><i>intercalatum</i> | L03655                                                                 | 16S rRNA                                                   | 286                          | [36]        | S.<br><i>guineensis</i>                                |

|     |                           |                        |                     |                     |               |                           |
|-----|---------------------------|------------------------|---------------------|---------------------|---------------|---------------------------|
| DRC | S.<br><i>intercalatum</i> | GCA_94447<br>0365.2*** | Reference<br>genome | 386,<br>052,<br>197 | Unpublished** | S.<br><i>intercalatum</i> |
|-----|---------------------------|------------------------|---------------------|---------------------|---------------|---------------------------|

444 DRC (Democratic Republic of the Congo), NHM (Natural History Museum, London), Conflicting  
 445 isolate labels in publication and NCBI\*. Unclear which geographical location is associated with  
 446 each sequence\*\*, Based on Webster et al., 2006\*\*, Current version of submitted GenBank  
 447 assembly\*\*, Originally sequenced as part of International Helminth Genomes Consortium [31].

448

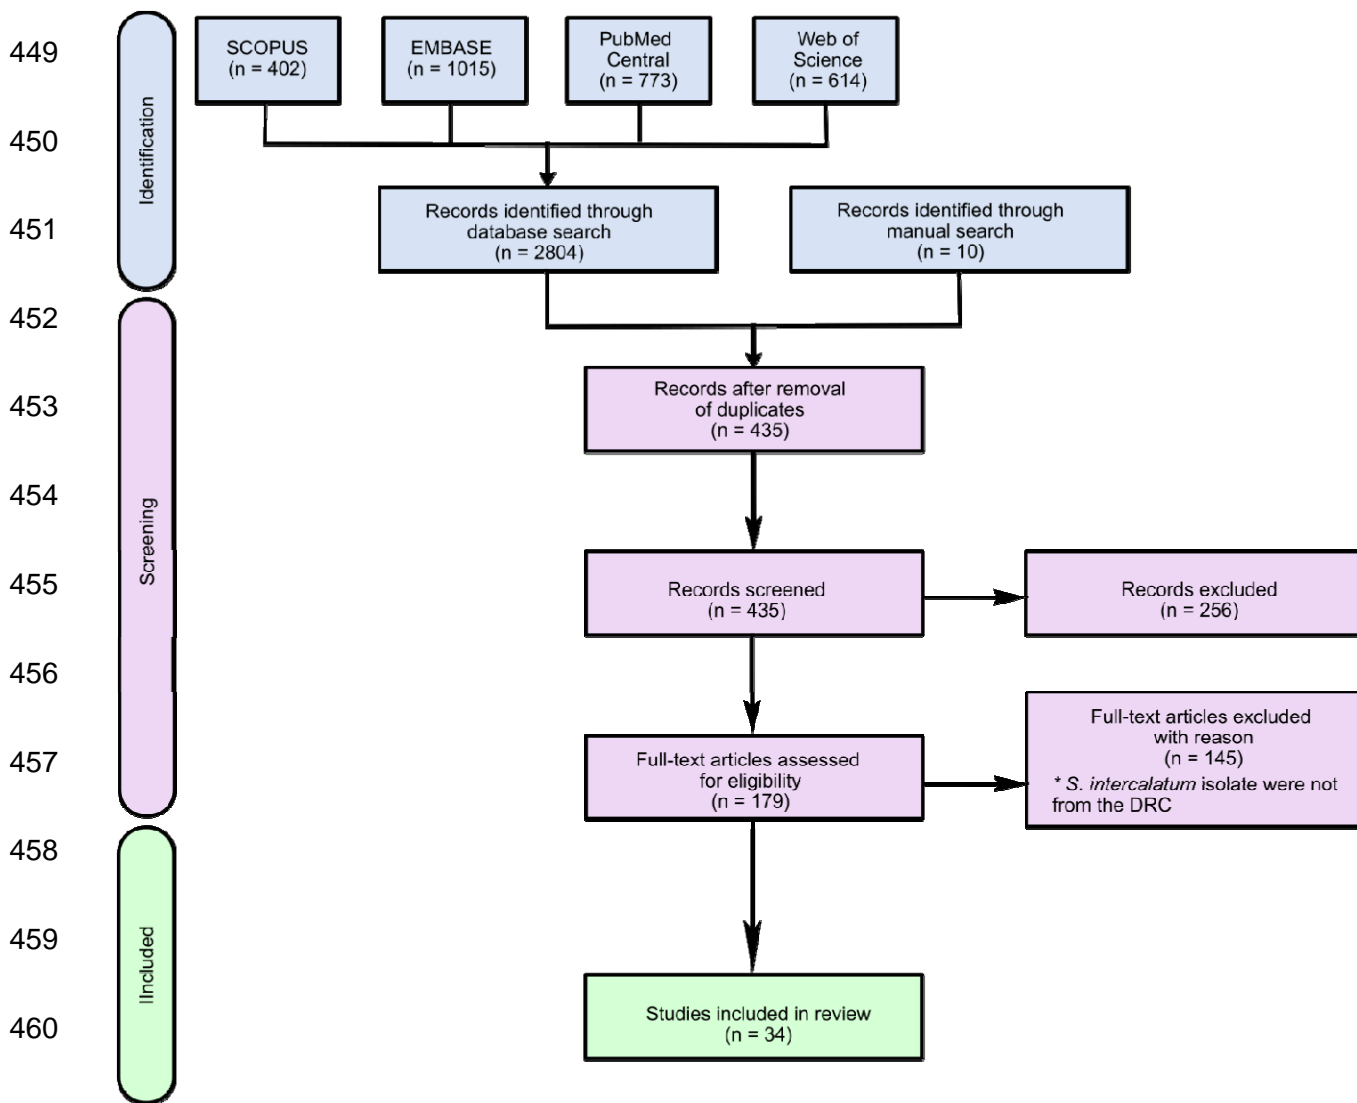

462 Fig.1 PRISMA chart of literature selection process on *Schistosoma intercalatum*

463

464

465

466

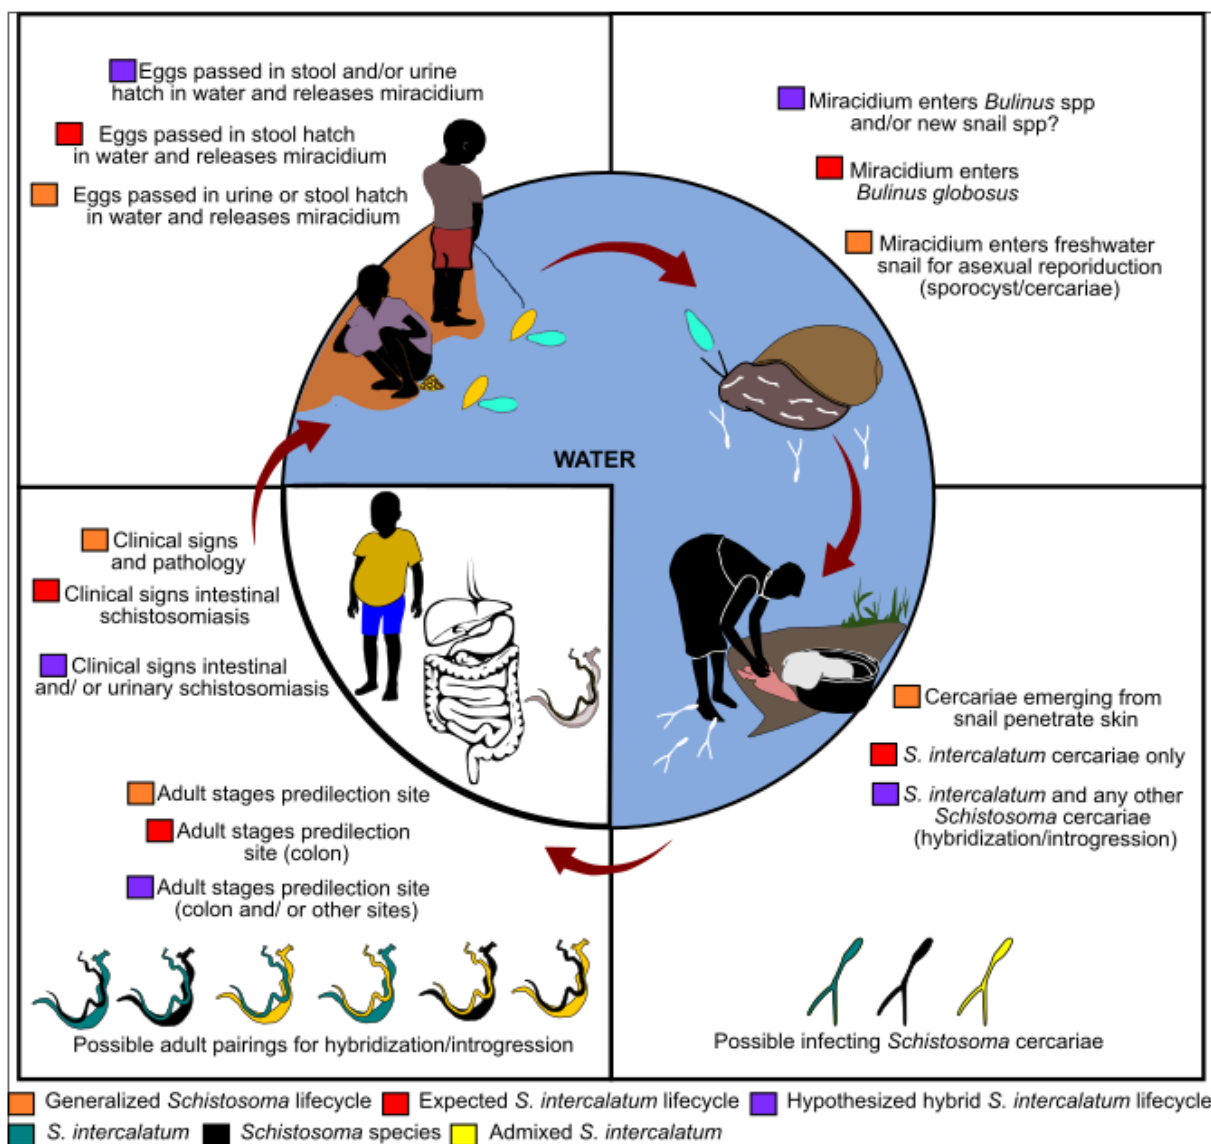

467

468 Figure 2. The life-cycle of *S. intercalatum* and its hybrid.
